# Supplementary material for: Prognostic Value of Transthoracic Echocardiography in Children With Pulmonary Arterial Hypertension
Source: PubMed Central journal article supplement — J Am Heart Assoc. 2023 Mar 16;12(6):e023118. doi: 10.1161/JAHA.121.023118 (PMC10111552; doi:10.1161/jaha.121.023118), 2023-03-16
Supplement: JAH3-12-e023118-s001.pdf [file JAH3-12-e023118-s001.pdf]

## **SUPPLEMENTAL MATERIAL**

**Table S1. Baseline haemodynamic and echocardiographic characteristics**

|                                                     |                     |                     |                      |                  |
|-----------------------------------------------------|---------------------|---------------------|----------------------|------------------|
| <b>Haemodynamic characteristics</b>                 |                     |                     |                      |                  |
| Mean pulmonary arterial pressure, mmHg mean (SD)    | 55.8 (24.0)         | 48.1 (21.3)         | 71.7 (21.8)          | <b>0.001</b>     |
| Mean aortic pressure, mmHg mean (SD)                | 63.1 (10.3)         | 63.4 (8.5)          | 62.6 (13.6)          | 0.80             |
| Right arterial pressure, mmHg median [IQR]          | 7.0 [5.0, 8.0]      | 6.0 [5.0, 8.0]      | 8.0 [7.3, 13.0]      | <b>0.017</b>     |
| Left atrial pressure, mmHg median [IQR]             | 8.0 [7.0, 10.0]     | 8.0 [6.0, 9.0]      | 8.5 [7.0, 11.0]      | 0.44             |
| Pulmonary artery oxygen saturation, % median [IQR]  | 69.5 [64.3, 75.6]   | 73.0 [67.0, 82.0]   | 65.0 [57.0, 71.0]    | <b>0.019</b>     |
| PVRI baseline, WUxm2 median [IQR]                   | 13.6 [9.3, 25.6]    | 11.8 [6.5, 22.1]    | 24.2 [13.5, 27.4]    | <b>0.01</b>      |
| PVRI with oxygen, WUxm2 median [IQR]                | 18.0 (12.3)         | 18.0 (12.3)         | 18.0 (14.1)          | 1.00             |
| PVRI with nitric oxide, WUxm2 median [IQR]          | 12.0 [5.9, 19.5]    | 10.3 [5.0, 15.2]    | 15.8 [12.1, 26.2]    | <b>0.03</b>      |
|                                                     |                     |                     |                      |                  |
| <b>Echocardiographic characteristics</b>            |                     |                     |                      |                  |
| <i>Right heart dimensions:</i>                      |                     |                     |                      |                  |
| Right atrial area, cm <sup>2</sup> median[IQR]      | 12.83 [9.75, 15.69] | 11.75 [9.28, 13.39] | 15.90 [11.10, 19.20] | <b>0.008</b>     |
| Right atrial z-score, median [IQR]                  | 2.92 [1.25, 5.11]   | 1.77 [1.03, 3.21]   | 5.31 [3.30, 7.21]    | <b>&lt;0.001</b> |
| Tricuspid valve diameter, cm mean (SD)              | 2.75 (0.75)         | 2.66 (0.68)         | 2.95 (0.88)          | 0.15             |
| Tricuspid valve diameter, z-score median [IQR]      | 2.78 [0.76, 5.23]   | 2.04 [0.32, 4.25]   | 4.56 [2.31, 5.65]    | <b>0.035</b>     |
| RV inflow diastolic diameter, cm median [IQR]       | 2.60 [1.85, 3.53]   | 2.44 [1.60, 2.85]   | 2.90 [2.28, 4.35]    | 0.09             |
| RV inflow systolic diameter, cm median [IQR]        | 2.40 [1.76, 3.70]   | 2.20 [1.40, 2.60]   | 3.45 [2.21, 4.48]    | <b>0.036</b>     |
| Pulmonary valve diameter, cm mean (SD)              | 2.15 (0.61)         | 2.07 (0.61)         | 2.31 (0.61)          | 0.16             |
| Pulmonary valve diameter, z-score mean (SD)         | 2.28 (2.66)         | 1.72 (2.78)         | 3.24 (2.17)          | <b>0.04</b>      |
| Right pulmonary artery dimension, cm mean (SD)      | 1.44 (0.51)         | 1.39 (0.52)         | 1.53 (0.48)          | 0.33             |
| Right pulmonary artery dimension, z-score mean (SD) | 1.72 (2.33)         | 1.42 (2.47)         | 2.24 (2.02)          | 0.20             |
| Left pulmonary artery dimension, cm mean (SD)       | 1.45 [1.12, 1.97]   | 1.44 [1.10, 1.95]   | 1.50 [1.20, 2.00]    | 0.56             |
| Left pulmonary artery dimension, z-score mean (SD)  | 2.21 [1.02, 4.92]   | 2.21 [0.56, 4.56]   | 2.21 [1.11, 5.25]    | 0.37             |
|                                                     |                     |                     |                      |                  |
| <i>Right ventricular function:</i>                  |                     |                     |                      |                  |

|                                                               |                     |                     |                     |                  |
|---------------------------------------------------------------|---------------------|---------------------|---------------------|------------------|
| Semiquantitative RV function, I-IV median [IQR]               | 2.00 [1.00, 2.50]   | 1.25 [1.00, 2.00]   | 2.50 [2.00, 3.00]   | <b>&lt;0.001</b> |
| Tricuspid annular plane systolic excursion, cm mean (SD)      | 1.59 (0.42)         | 1.66 (0.45)         | 1.47 (0.34)         | 0.10             |
| Tricuspid annular plane systolic excursion, z-score mean (SD) | -2.77 (2.40)        | -2.36 (2.52)        | -3.56 (1.95)        | 0.07             |
| RV dp.dt, median [IQR]                                        | 1143 [964, 1620]    | 1131 [966, 1403]    | 1236 [924, 1629]    | 0.75             |
| RV shortening fraction, % mean (SD)                           | 39.5 (12.2)         | 38.1 (11.7)         | 42.3 (13.0)         | 0.21             |
| <i>PHT severity parameters:</i>                               |                     |                     |                     |                  |
| Tricuspid regurgitation Doppler velocity, m/s mean (SD)       | 4.27 (0.92)         | 3.99 (0.85)         | 4.79 (0.82)         | <b>0.001</b>     |
| Pulmonary acceleration time, ms median [IQR]                  | 67.0 [51.0, 83.0]   | 75.8 [59.5, 98.5]   | 50.0 [47.0, 73.5]   | <b>0.008</b>     |
| <i>Left heart dimensions:</i>                                 |                     |                     |                     |                  |
| Left atrial area, cm <sup>2</sup> median[IQR]                 | 8.08 (3.48)         | 8.09 (3.45)         | 8.07 (3.62)         | 0.98             |
| Left atrial z-score, median [IQR]                             | -1.01 [-1.81, 0.55] | -1.02 [-1.75, 0.35] | -0.89 [-2.00, 0.76] | 0.90             |
| Mitral valve diameter, cm mean (SD)                           | 1.98 (0.55)         | 2.04 (0.56)         | 1.84 (0.51)         | 0.19             |
| Mitral valve diameter, z-score median [IQR]                   | -2.36 (2.46)        | -2.18 (2.62)        | -2.73 (2.09)        | 0.42             |
| LV inflow diastolic diameter, cm median [IQR]                 | 31.72 (8.86)        | 34.07 (8.38)        | 27.26 (8.16)        | <b>0.004</b>     |
| LV inflow systolic diameter, cm median [IQR]                  | 19.24 (6.63)        | 20.83 (5.63)        | 16.21 (7.45)        | <b>0.01</b>      |
| Aortic valve diameter, cm mean (SD)                           | 1.48 (0.38)         | 1.47 (0.38)         | 1.50 (0.40)         | 0.75             |
| Aortic valve diameter, z-score mean (SD)                      | -1.92 (1.23)        | -1.97 (1.33)        | -1.81 (1.02)        | 0.64             |
| <i>Left ventricular function:</i>                             |                     |                     |                     |                  |
| Ejection fraction, % mean (SD)                                | 69.6 (14.8)         | 67.8 (14.1)         | 73.2 (16.0)         | 0.19             |
| <i>Left ventricular eccentricity indices:</i>                 |                     |                     |                     |                  |
| Systolic LV eccentricity index, median [IQR]                  | 1.9 [1.5, 2.5]      | 1.70 [1.5, 2.2]     | 2.4 [1.7, 3.4]      | <b>0.014</b>     |
| Diastolic LV eccentricity index, median [IQR]                 | 1.5 [1.3, 1.8]      | 1.3 [1.2, 1.6]      | 1.8 [1.4, 2.0]      | <b>0.001</b>     |
| <i>Tissue Dopple characteristics</i>                          |                     |                     |                     |                  |
| Tricuspid valve S-wave, m/s mean (SD)                         | 0.11 (0.02)         | 0.11 (0.02)         | 0.10 (0.03)         | 0.29             |

|                                                  |                   |                   |                   |             |
|--------------------------------------------------|-------------------|-------------------|-------------------|-------------|
| Tricuspid valve E-wave, m/s mean (SD)            | 0.12 (0.04)       | 0.13 (0.04)       | 0.11 (0.05)       | 0.15        |
| Tricuspid valve A-wave, m/s mean (SD)            | 0.11 (0.03)       | 0.11 (0.03)       | 0.11 (0.02)       | 0.75        |
| Interventricular septum S-wave, m/s median [IQR] | 0.06 [0.05, 0.07] | 0.06 [0.05, 0.07] | 0.06 [0.04, 0.07] | 0.12        |
| Interventricular septum E-wave, m/s median [IQR] | 0.07 [0.06, 0.10] | 0.08 [0.06, 0.10] | 0.06 [0.04, 0.08] | <b>0.02</b> |
| Interventricular septum A-wave, m/s median [IQR] | 0.06 [0.05, 0.07] | 0.06 [0.05, 0.06] | 0.06 [0.05, 0.07] | 0.70        |
| Mitral valve S-wave, m/s mean (SD)               | 0.06 [0.05, 0.08] | 0.06 [0.06, 0.08] | 0.06 [0.05, 0.07] | 0.06        |
| Mitral valve E-wave, m/s mean (SD)               | 0.11 (0.04)       | 0.12 (0.04)       | 0.09 (0.05)       | <b>0.01</b> |
| Mitral valve A-wave, m/s mean (SD)               | 0.05 [0.05, 0.07] | 0.05 [0.05, 0.06] | 0.06 [0.04, 0.08] | 0.34        |

LV=left ventricle, PHT=pulmonary hypertension, PVRI=pulmonary vascular resistance index, RV=right ventricle. *P*-values refer to comparisons between patients with and without transplant-free survival.

**Table S2.** Robustness of parameters on univariate Cox analysis to random selection and random replacement:

| Parameter                              | Significance of 80% random sample | Significance of random sampling with replacement |
|----------------------------------------|-----------------------------------|--------------------------------------------------|
| RA area (z-score)                      | 1000                              | 1000                                             |
| LV eccentricity index diastolic        | 999                               | 999                                              |
| RA area (cm <sup>2</sup> )             | 998                               | 998                                              |
| RV inflow diameter systolic (cm)       | 945                               | 743                                              |
| RV semiquant function (>2)             | 919                               | 1000                                             |
| LV eccentricity index systolic         | 902                               | 939                                              |
| LV eccentricity index diastolic (norm) | 871                               | 886                                              |
| TV velocity (m/s)                      | 789                               | 885                                              |
| E-wave lat. MV (mm/s)                  | 754                               | 840                                              |
| LV inflow diameter diastolic (cm)      | 712                               | 805                                              |
| LV eccentricity index systolic (norm)  | 701                               | 761                                              |
| LV inflow diameter systolic (cm)       | 678                               | 798                                              |
| RV inflow diameter diastolic (cm)      | 599                               | 663                                              |
| A-wave lat. MV (mm/s)                  | 495                               | 514                                              |
| TV diameter (z-score)                  | 438                               | 440                                              |
| TV diameter (cm)                       | 406                               | 487                                              |
| Pulmonary valve diameter (z-score)     | 381                               | 485                                              |
| PA acceleration time (ms)              | 282                               | 417                                              |

Illustration of the robustness of the significant association between various parameters and transplant-free survival on univariate Cox analysis. Random samples were taken from the dataset and the analysis was repeated 1,000 times. The numbers show how frequent (out of 1,000 maximum) the parameter in question remain significant. For details we refer to the Methods and Results section of the manuscript.

LV = left ventricular, PA = pulmonary artery, RA = right atrial, RV = right ventricular.
